# Supplementary material for: Pneumonia hospitalizations and mortality in children 3 – 24-month-old in Nigeria from 2013 to 2020: Impact of pneumococcal conjugate vaccine ten valent (PHiD-CV-10)
Source: PubMed Central journal article supplement — Hum Vaccin Immunother. 2023 Jan 3;19(1):2162289. doi: 10.1080/21645515.2022.2162289 (PMC9980440; doi:10.1080/21645515.2022.2162289), 2023-01-03
Supplement: KHVI_A_2162289_SM4918.pdf [file KHVI_A_2162289_SM4918.pdf]

## SUPPLEMENTAL MATERIAL

### Sample Size

The overall goal of this project was to determine the impact of PCV-10 in reducing proportions of hospitalized radiologically defined pneumonia and case fatality rates in children aged 3 to 24 months in Nigeria. As mentioned earlier that the proposed surveillance will use a more sensitive case definition (and with a loss of certain amount of specificity) it is expected that 50% of the severe pneumonia admissions will be radiologically confirmed with a margin of error ranging between 3-5%. Since the total population in the catchment area was not exactly known, we used the population parameter as unknown. The confidence limit was 95%. We used the following formula to calculate the number of medical charts required for both before and after PCV- 10 introduction analysis to generate Table.

$$SS = Z^2 * p * (1-p) / C^2$$

SS= Sample size

Z= Z value (1.96 for 95% CI)

P= expected proportion of the disease (pneumonia) to be picked up

C= Margin of error

Table 7: Sample size variation to be within the expected margin of error with 95% and 99% CI

| Sample size | Expected proportion of disease | CI  | Error Margin | CI  | Error Margin |
|-------------|--------------------------------|-----|--------------|-----|--------------|
| 500         | 0.5                            | 95% | 4.38         | 99% | 5.77         |
| 600         | 0.5                            | 95% | 4.0          | 99% | 5.27         |
| 700         | 0.5                            | 95% | 3.7          | 99% | 4.88         |
| 800         | 0.5                            | 95% | 3.46         | 99% | 4.56         |
| 900         | 0.5                            | 95% | 3.27         | 99% | 4.3          |
| 1000        | 0.5                            | 95% | 3.1          | 99% | 4.08         |
| 1100        | 0.5                            | 95% | 2.95         | 99% | 3.89         |

We planned to document about 300 severe pneumonia admissions per site over a 3-year-period of study giving a total of 900 from all the three sites. But the actual enrolment was 777, which although lower, is still within a margin of error between 4.56 and 4.88, CI 99%.
